# Supplementary material for: Proteomic Analysis of the Bovine and Human Ciliary Zonule
Source: PubMed Central journal article supplement — Invest Ophthalmol Vis Sci. 2017 Jan;58(1):573–85. doi: 10.1167/iovs.16-20866 (PMC5283081; doi:10.1167/iovs.16-20866), 2017-01
Supplement: iovs-57-15-47_s06.pdf [file iovs-57-15-47_s06.pdf]

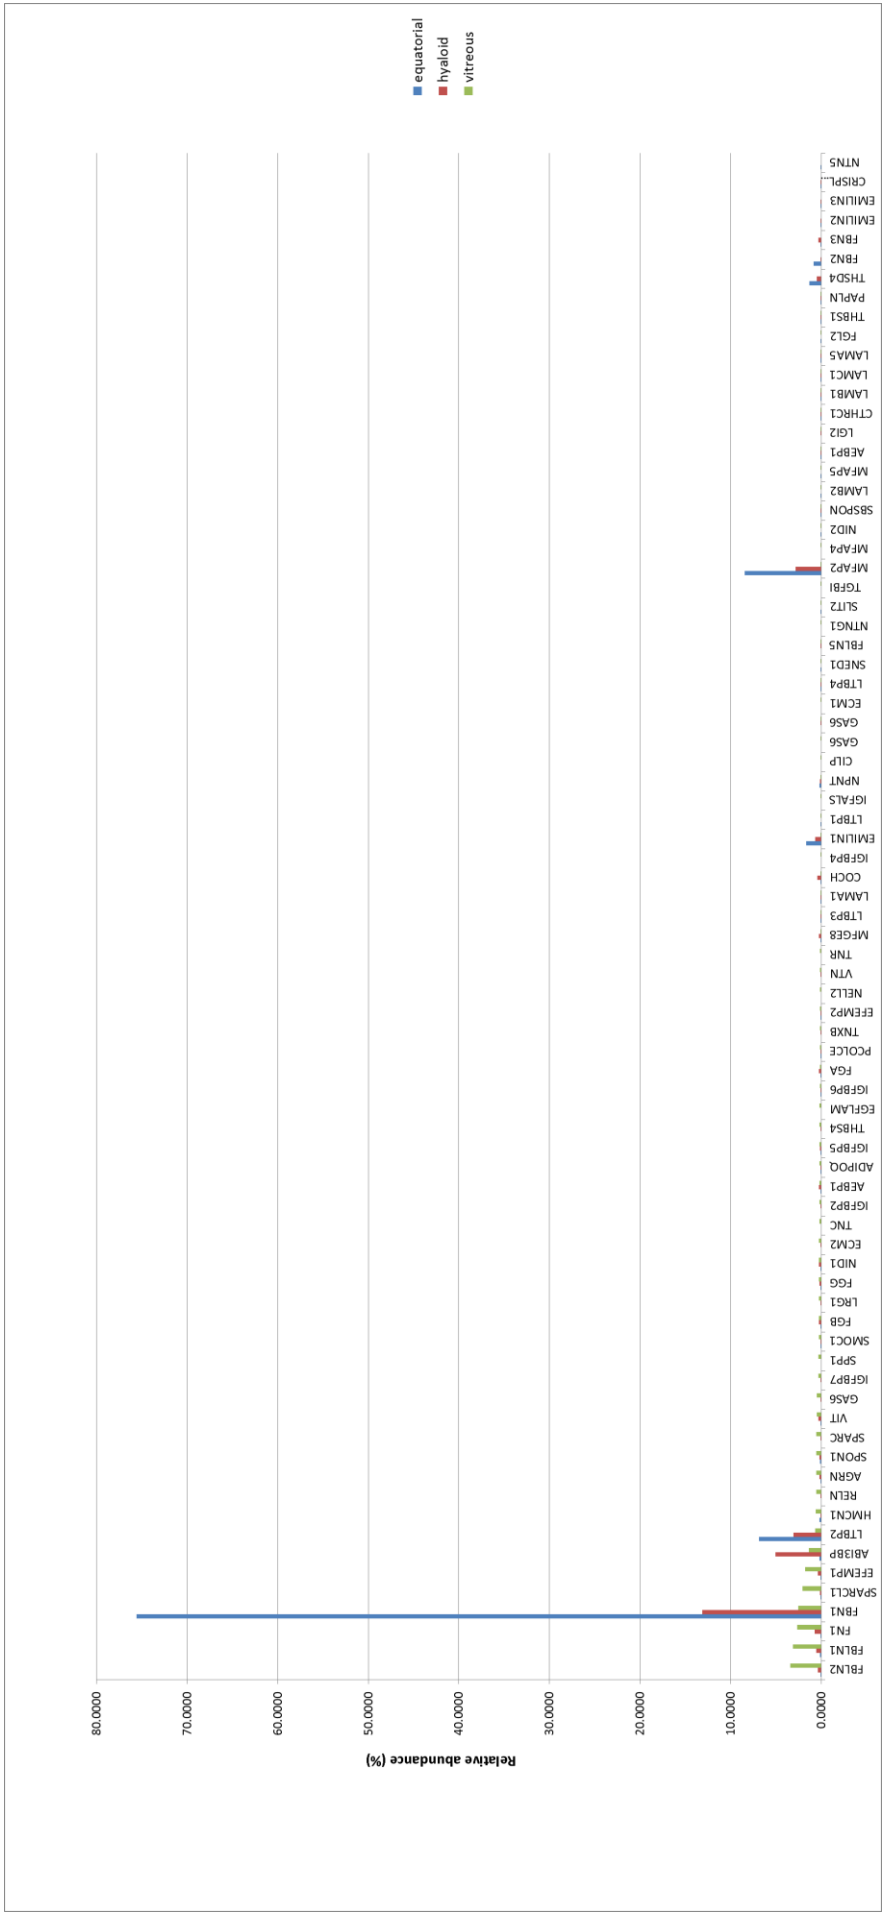

S6. Relative abundance of glycoproteins in bovine samples of the equatorial zonule, hyaloid zonule and vitreous humor.
